# Supplementary material
Source: PubMed Central journal article supplement (PMC6009910)
Supplement: IENZ_A_1243534_SM4219.pdf [file IENZ_A_1243534_SM4219.pdf]

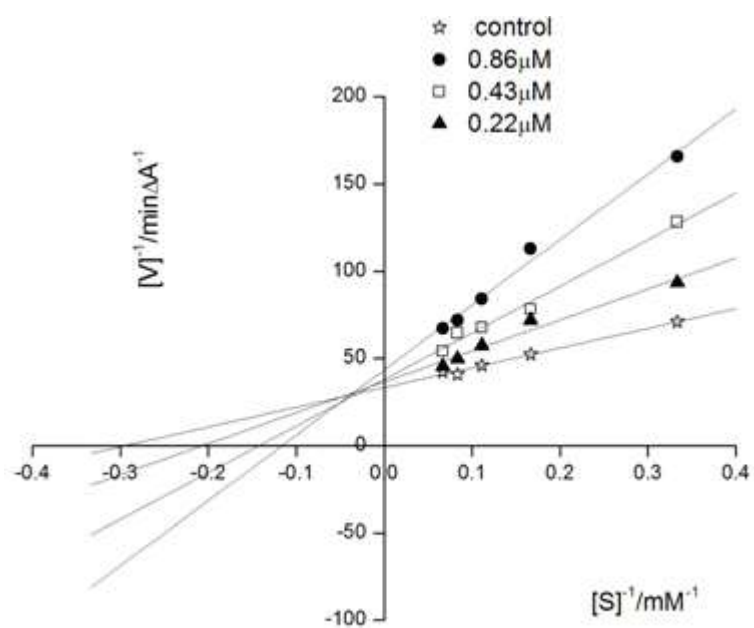

**Figure 1** Lineaweaver-Burk plot for the inhibition of AChE by compound 4I.

**Table 2** Kinetic parameters of AChE inhibition by compound 4I.

| /μM  | Michaelis-Menten equation | $K_m$ /mM | $V_{max}/\Delta A \text{min}^{-1}$ | $K_i/\mu\text{M}$ | $K_i'/\mu\text{M}$ |
|------|---------------------------|-----------|------------------------------------|-------------------|--------------------|
| 0    | $1/v=113.00/[S]+33.34$    | 3.390     | 0.0300                             |                   |                    |
| 0.22 | $1/v=177.18/[S]+36.64$    | 4.835     | 0.0273                             | 0.38              | 2.95               |
| 0.43 | $1/v=266.93/[S]+37.96$    | 7.032     | 0.0263                             |                   |                    |
| 0.86 | $1/v=374.01/[S]+43.44$    | 8.610     | 0.0230                             |                   |                    |

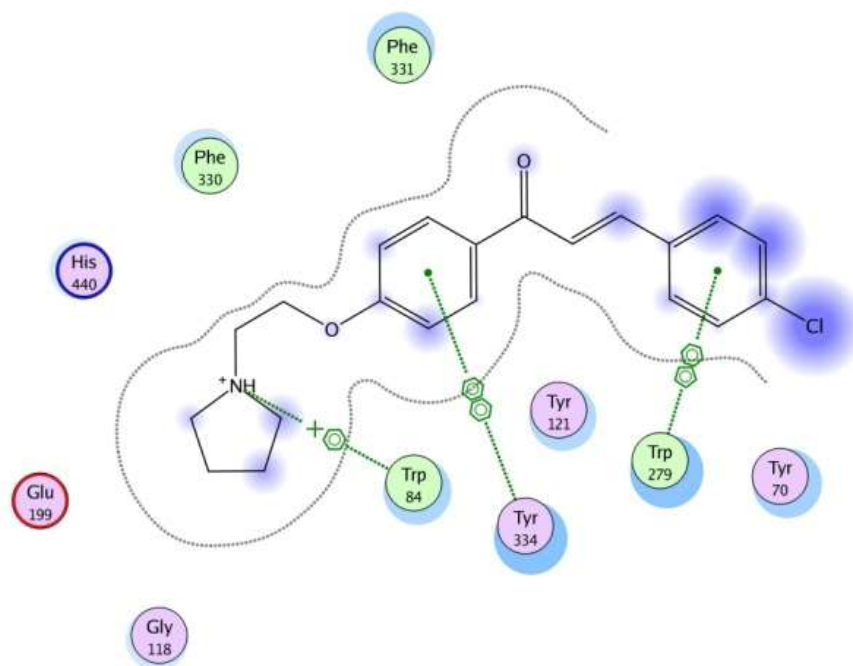

A

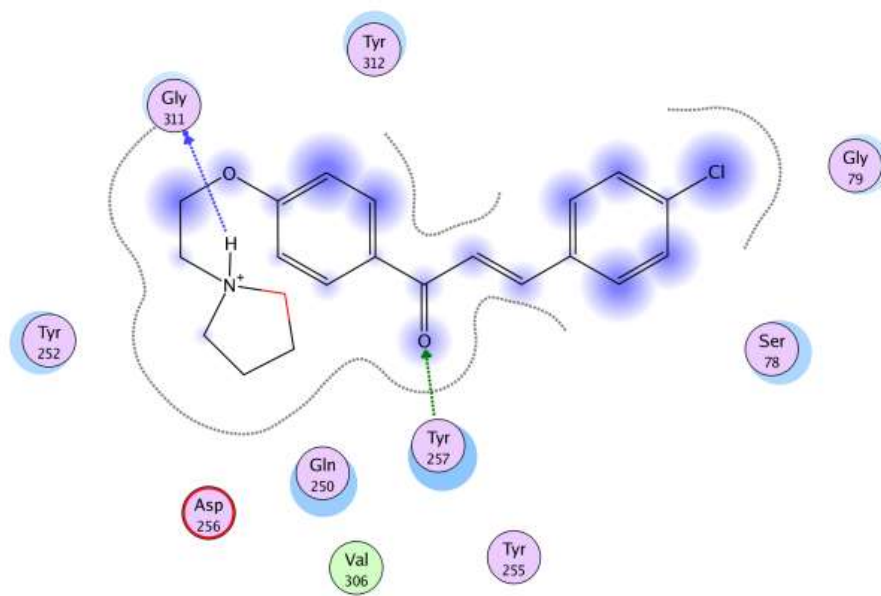

B

**Figure 2** Molecular modeling of compound 4l with AChE (A) and BuChE (B) generated with MOE2008.
